# Supplementary material for: Familial aggregation of albuminuria and arterial hypertension in an Aboriginal Australian community and the contribution of variants in ACE and TP53
Source: Springer Nature journal article supplement (doi:10.1186/s12882-016-0396-2), 2016-11-21

## Supplementary Material

### Supplementary Tables

**Supplementary Table 1.** SNP allele frequencies in present sample (maximum likelihood estimates and ASE).

| Gene  | SNP             | Minor Allele (Other) | MAF (ASE)     |
|-------|-----------------|----------------------|---------------|
| ACE   | rs4646994       | D (I)                | 0.097 (0.015) |
| TP53  | rs1042522       | Arg (Pro)            | 0.427 (0.024) |
| NOS3  | rs1799983 (G/T) | T (G)                | 0.011 (0.005) |
|       | rs2070744       | C (T)                | 0.113 (0.015) |
|       | intron4 VNTR    | B (A)                | 0.111 (0.015) |
| MTHFR | rs1801133       | 2 (1)                | 0.449 (0.024) |

**Supplementary Table 2.** Likelihood ratio test based P-values simultaneously testing SNP association with systolic and diastolic blood pressure (sBP, dBP), log urinary albumin:creatinine ratio (UACR) and fasting plasma glucose (FPG), in a multivariate mixed model adjusting for age, sex, height and weight.

| Gene  | SNP             | P-value  |
|-------|-----------------|----------|
| ACE   | rs4646994       | 0.000770 |
| TP53  | rs1042522       | 0.017547 |
| NOS3  | rs1799983 (G/T) | 0.538375 |
|       | rs2070744       | 0.938210 |
|       | intron4 VNTR    | 0.942033 |
| MTHFR | rs1801133       | 0.360096 |

## Supplementary Figures

**Supplementary Figure 1.** Semiparametric smooths for relationships of logACR and diastolic BP with age, sex, weight and genotype.

**Supplementary Figure 2.** Semiparametric smooths for relationship of eGFR with age, sex, height, BMI and genotype.

**Supplementary Figure 3.** Effect of ACE insertion-deletion genotype on cross-sectional relationship between age and mean blood pressure. Red curve is D/I genotype group; blue, the I/I genotype group; the dotted black line is the overall curve.

**Supplementary Figure 4.** Effect of ACE insertion-deletion genotype on cross-sectional relationship between age and diastolic blood pressure. Red upper curve is D/I genotype group; blue lower curve the I/I genotype group; the dotted black line is the overall curve.

**Supplementary Figure 5.** Effect of ACE insertion-deletion genotype on cross-sectional relationship between age and systolic blood pressure. Red upper curve is D/I genotype group; blue lower curve the I/I genotype group; the dotted black line is the overall curve.

**Supplementary Figure 6.** Effect of ACE insertion-deletion genotype on cross-sectional relationship between age and eGFR. Red curve is D/I genotype group; blue, the I/I genotype group; the dotted black line is the overall curve. Presumably, the presence of reserve capacity makes relationship with genotype less clearcut than with UACR, confirming the latter is a more sensitive measure.

**Supplementary Figure 1.** Semiparametric smooths for relationships of logACR and diastolic BP with age, sex, weight and genotype.

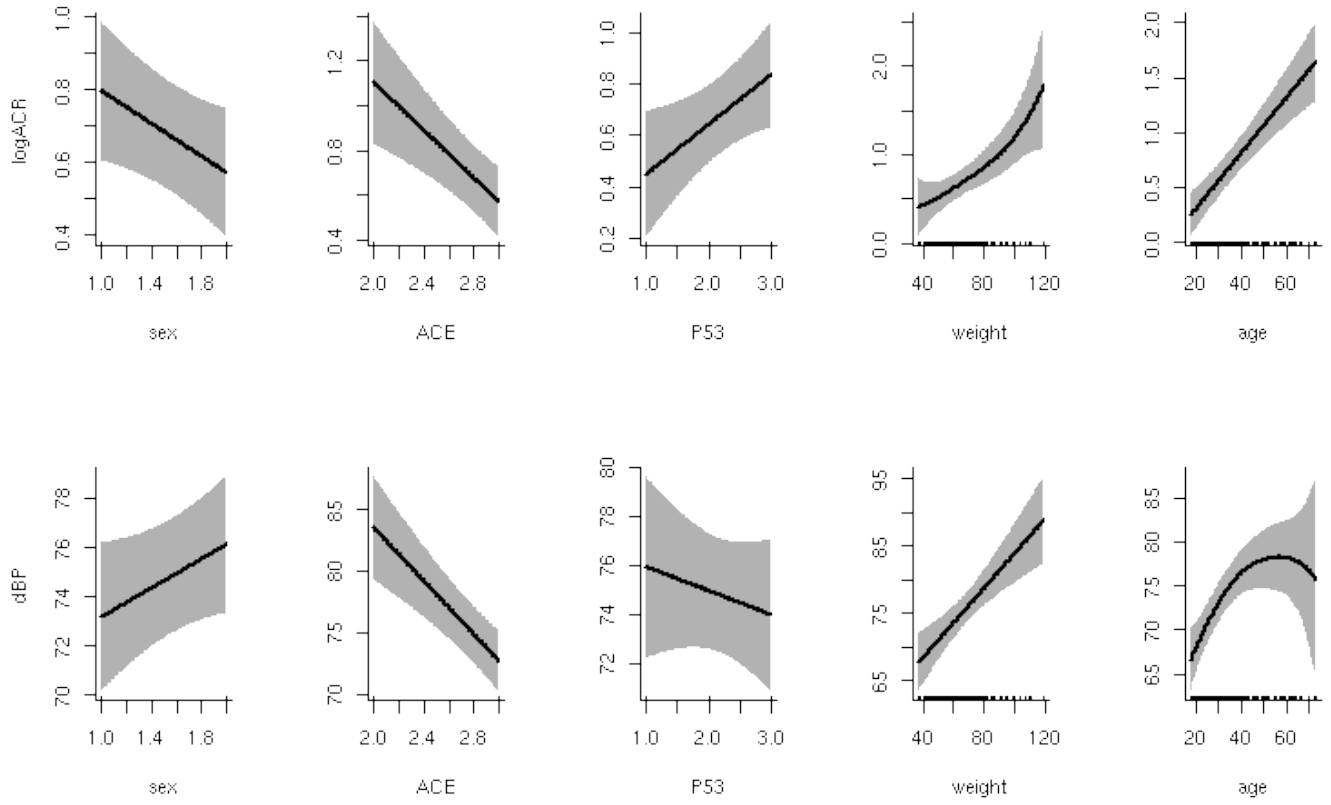

**Supplementary Figure 2.** Semiparametric smooths for relationship of eGFR with age, sex, height, BMI and genotype.

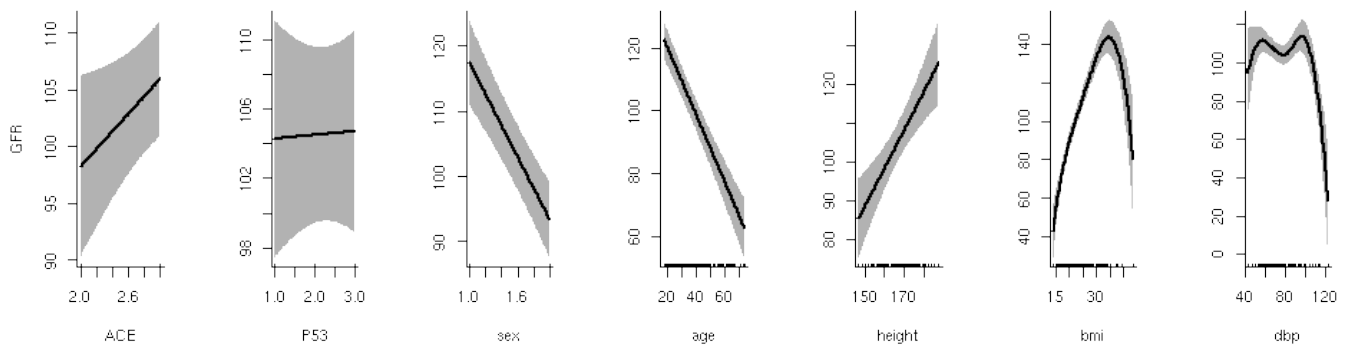

**Supplementary Figure 4.** Effect of ACE insertion-deletion genotype on cross-sectional relationship between age and diastolic blood pressure. Red upper curve is D/I genotype group; blue lower curve the I/I genotype group; the dotted black line is the overall curve.

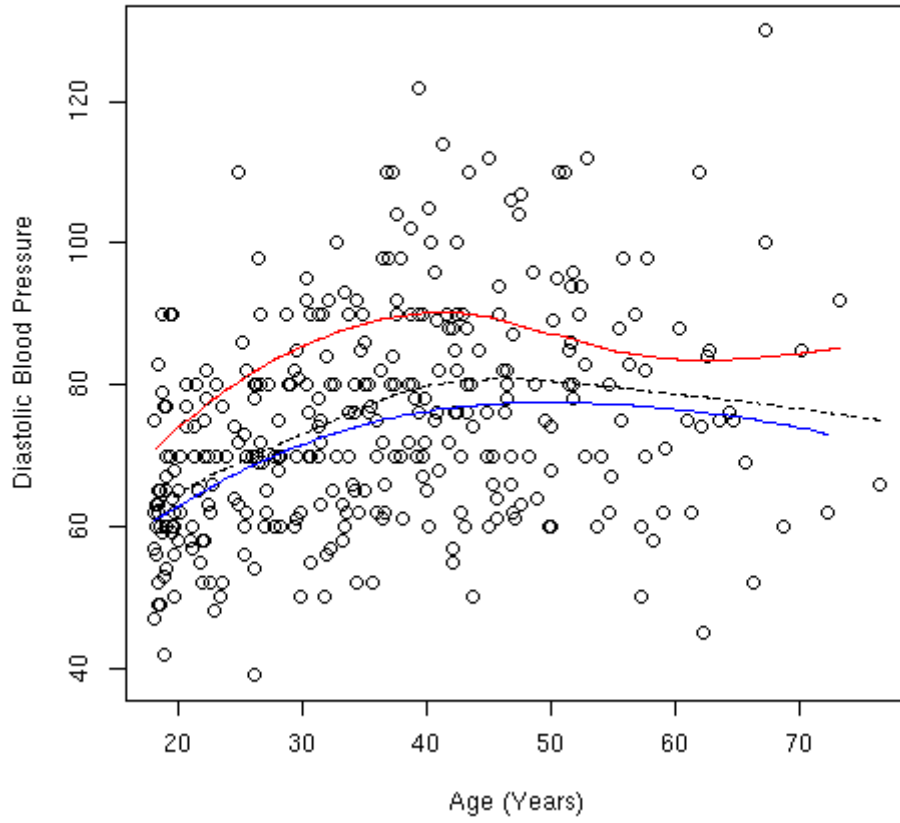

**Supplementary Figure 5.** Effect of ACE insertion-deletion genotype on cross-sectional relationship between age and systolic blood pressure. Red upper curve is D/I genotype group; blue lower curve the I/I genotype group; the dotted black line is the overall curve.

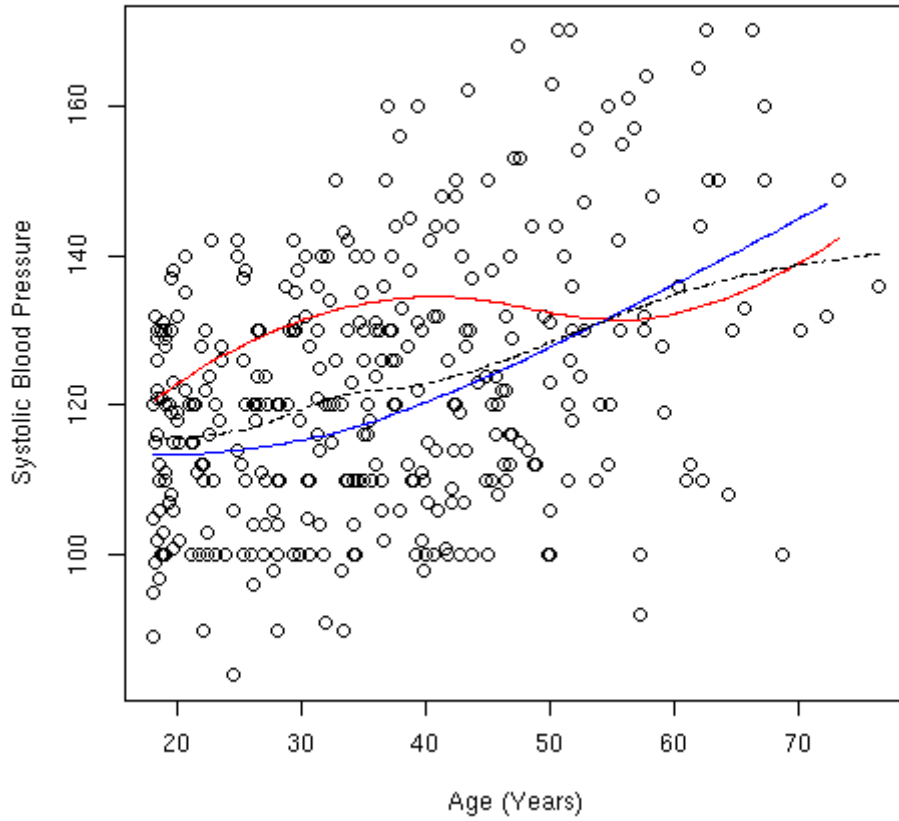

**Supplementary Figure 6.** Effect of ACE insertion-deletion genotype on cross-sectional relationship between age and eGFR. Red curve is D/I genotype group; blue, the I/I genotype group; the dotted black line is the overall curve. Presumably, the presence of reserve capacity makes relationship with genotype less clearcut than with UACR, confirming the latter is a more sensitive measure.

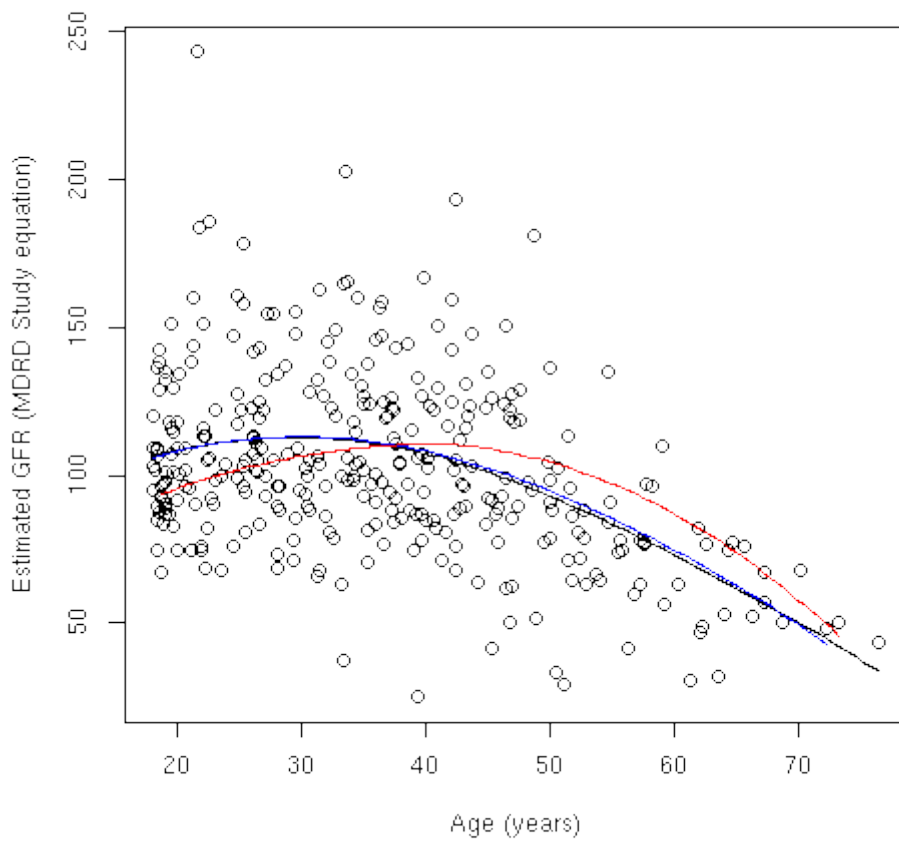

Supplement: MOESM1 [file 11076896]
